# Supplementary material for: A sinemydid turtle from the Jehol Biota provides insights into the basal divergence of crown turtles
Source: PubMed Central journal article supplement (PMC4639786; doi:10.1038/srep16299), 2015-11-10

## **Supplementary Information**

### **A sinemydid turtle from the Jehol Biota provides insights into the basal divergence of crown turtles**

Chang-Fu Zhou<sup>1\*</sup>, and Márton Rabi<sup>2,3\*</sup>

<sup>1</sup>Paleontological Institute, Shenyang Normal University, Shenyang 110034, Liaoning, China;

<sup>2</sup>Institut für Geowissenschaften, University of Tübingen, Hölderlinstraße 12, 72074 Tübingen, Germany. E-mail: iszkenderun@gmail.com

<sup>3</sup>Department of Paleontology & MTA – ELTE Lendület Dinosaur Research Group, Eötvös Loránd University, Budapest, Hungary.

Correspondence and requests for materials should be addressed to C.-F.Z. (e-mail: zhoucf528@163.com) or M. R. (e-mail: iszkenderun@gmail.com).

#### **Content:**

**Supplementary Note**

**Supplementary Discussion**

**Supplementary Materials**

**Institutional abbreviations**

**Supplementary Data**

**Supplementary References**

**Synapomorphy Tree**

## Supplementary Note

**Ontogeny and taxonomy.** *Xiaochelys ningchengensis* is known from a single and admittedly small-sized specimen (130.4 mm maximal carapace length) therefore its ontogenetic stage needs to be clarified. Moreover, it has a circular carapace and possesses wide vertebral scales, often characteristic of juvenile turtles. However, juvenile turtles almost exclusively have a poorly ossified shell with fontanelles between the costals and peripherals and in the central and bridge area of the plastron. *X. ningchengensis* had a fully ossified shell however with all fontanelles closed. Although few growth series have been reported for fossil turtles, a notable exception to the above mentioned pattern happens to include another Chinese turtle from the Early Cretaceous: *Sinemys lens* Wiman 1930 (Brinkman and Peng 1993a). All individuals of *S. lens* come from a single formation and, though greatly differ in size, all have a fully ossified carapace (the plastron is often unknown). These individuals are interpreted to represent an ontogenetic series (Brinkman and Peng 1993a). The smallest individual of *S. lens* has a circular, well-ossified carapace, wide vertebrals and a well-developed spine on peripheral 7 whereas in successively larger individuals the carapace becomes gradually more elongated with narrower vertebrals and a reduced peripheral spine. A negative allometric relationship between body size and neural spine length has been reported for the extant emydid *Graptemys* spp. (Pritchard 1979). Thus *S. lens* potentially provides an example of full ossification of the carapace during a juvenile ontogenetic stage and raises the possibility that the only specimen of *X. ningchengensis* is a juvenile, especially given that it is also considered a sinemydid. However, *X. ningchengensis* exhibits enough non-ontogeny-related

morphological differences that warrant the introduction of a new taxon. *X. ningchengensis* is distinct from other sinemydids, including *Manchurochelys manchoukuoensis* in having a moderate upper temporal emargination, larger neural 8, and a larger first suprapygal; *Dracochelys biscupis* in having a shallow nuchal emargination, eight neurals, closed costo-peripheral and central-lateral plastral fontanelles even in subadults, upturned peripherals; *Liaochelys jianchangensis* and *Ordosemys* spp. in having a longer supraoccipital crest, closed plastral fenestrae, and lacking a distally-expanded costal 3 (*L. jianchangensis*) or a preneural plate (*Ordosemys* spp.); and *Sinemys* spp. in having a long postorbital, presence of a pygal and cervical scale, and lacking the lateral spine on peripheral 7 and the central and lateral plastral fontanelles.

Moreover, *X. ningchengensis* is excluded from *Wuguia* spp. by a narrower nuchal and the absence of additional ossifications in the nuchal and suprapygal region; and from *Changmachelys bohlini* by closed costo-peripheral fontanelles in small size, and closed plastral fenestrae. It differs from *Kirgizemys* (= *Hangaiemys*) spp., *Judithemys sukhanovi*, and *Macrobaena mongolica* in having a narrower distal end of posterior costals. *X. ningchengensis* is furthermore different from *Macrobaena mongolica* (PIN 533-4) in having a narrow interorbital roof, pleural sulci extending on peripherals 8-11, and foraminae on the lateral sides of the caudal centra; and from *Judithemys sukhanovi* in having upturned peripherals and subrectangular anterior neurals.

Given that *X. ningchengensis* can not be referred to any known genus or species with confidence we here recognize it as a separate taxon. This is also supported by our

phylogenetic analysis that places it as the sister taxon of a larger clade of sinemydids. Future discoveries may clarify the ontogenetic stage of the type specimen and may revise its taxonomic status accordingly.

## Supplementary Discussion

### The effect on topology and tree length of forcing *Judithemys sukhanovi* to various crown-cryptodire clades

To reveal how tree length changes under different hypotheses where sinemydids are placed on the stem of various cryptodiran clades, we conducted multiple analyses in which *Judithemys sukhanovi* (a member of Sinemydidae in our analysis but has been repeatedly found closer to the cryptodiran crown) was forced to the stem of Chelydroidea, Kinosternoidea, Americhelydia, Durocryptodira, Testudinoidea and Trionychia, respectively. All analyses included a molecular backbone and fossil taxa were set as floaters (see list above; except *J. sukhanovi*). Forcing *Judithemys sukhanovi* is a more conservative approach for testing the robustness of the placement of sinemydids than forcing other sinemydids.

Constraining *J. sukhanovi* to the stem of Chelydroidea yields 206 equally parsimonious trees of 860 steps and a consensus where xinjiangchelyids, sinemydids, *Changmachelys bohlini*, and *Kirgizemys hoburensis* float into crown-cryptodira and placed as stem-chelydroids (Fig. S2).

The most parsimonious trees are six steps longer than that of the unforced analysis. One synapomorphy supports this clade: a tail as long as the carapace which is otherwise optimized as a symplesiomorphies for Cryptodira in the unforced analysis.

Strict consensus of 206 trees

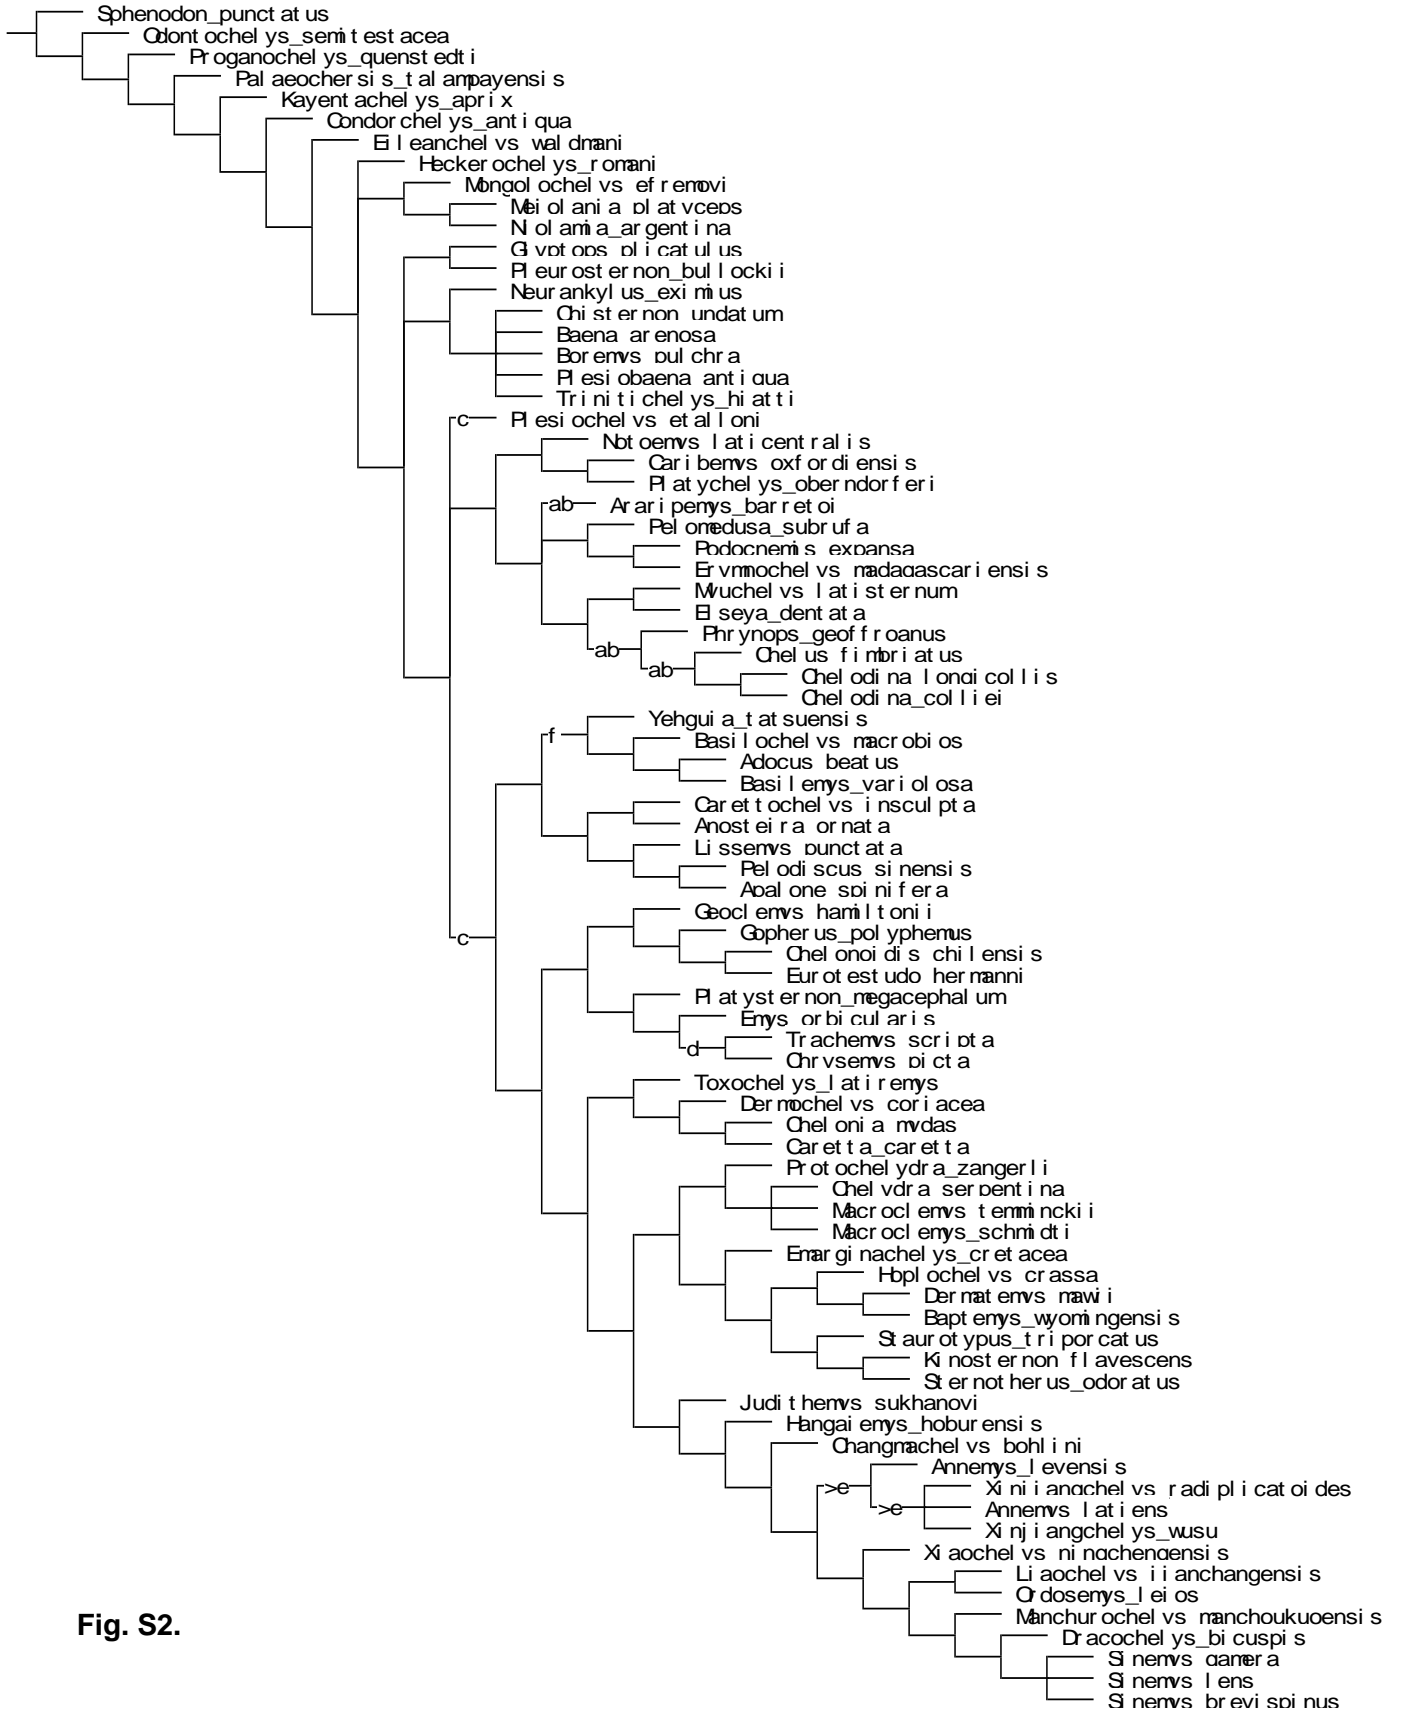

Fig. S2.

Constraining *J. sukhanovi* to the stem of Kinosternoidea results in trees of 863 steps; nine steps longer than the most parsimonious trees (Fig. S3). One synapomorphy supports the clade of pan-kinosternoids and sinemydids + xinjiangchelyids + *K. hoburensis*, *C. bohlini*: presence of musk ducts.

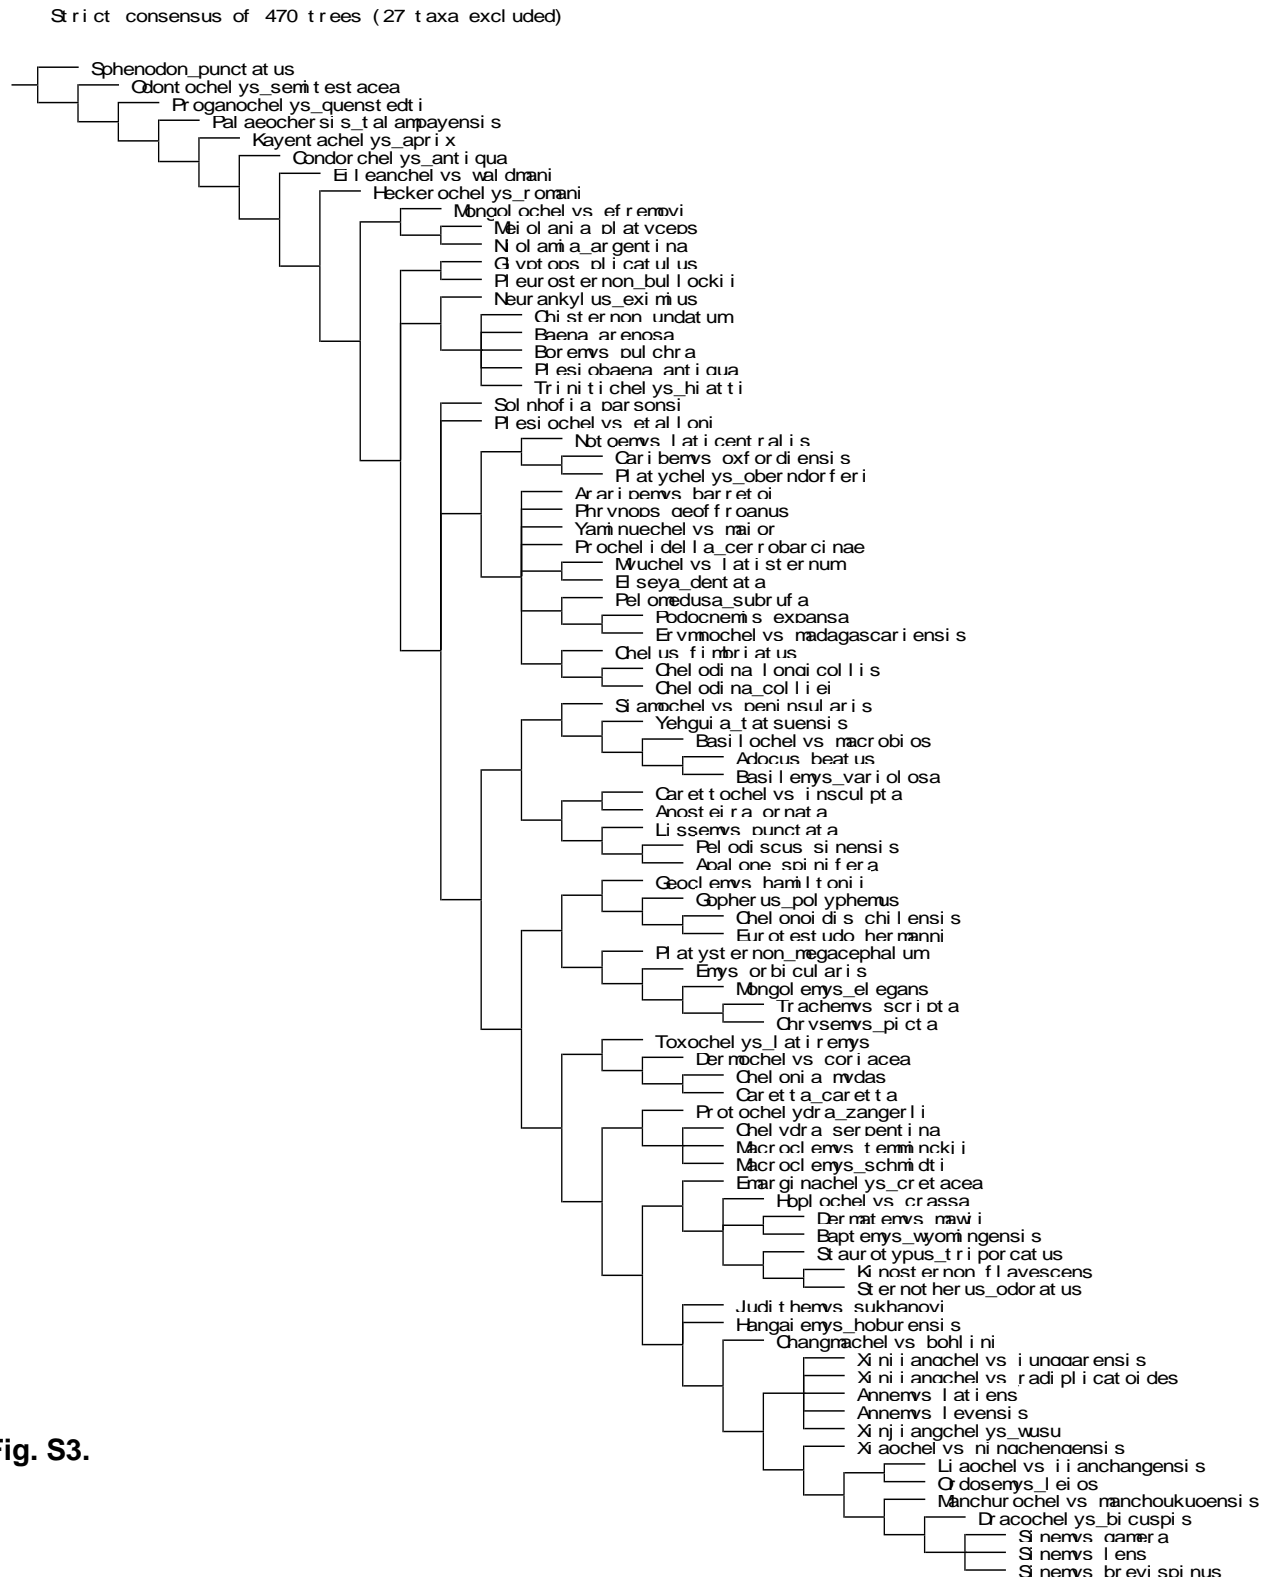

Fig. S3.

Constraining *J. sukhanovi* to the stem of Americhelydia [(Cheloniodea (Chelydridae + Kinosternoidea)) sensu Joyce et al. 2013] results in seven extra steps (n=861) and in the placement of xinjiangchelyids, sinemydids, *Kirgizemys hoburensis*, and *Changmachelys bohlini* as stem-americhelydians (Fig. S4). The synapomorphies supporting this node are narrow and elongate epiplastra, loosely sutured entoplastron, coalescent thyroid fenestra, and a cruciform plastron. These characters are, however, polarized as primitive for crown-cryptodira in the most parsimonious trees of the unforced analysis.

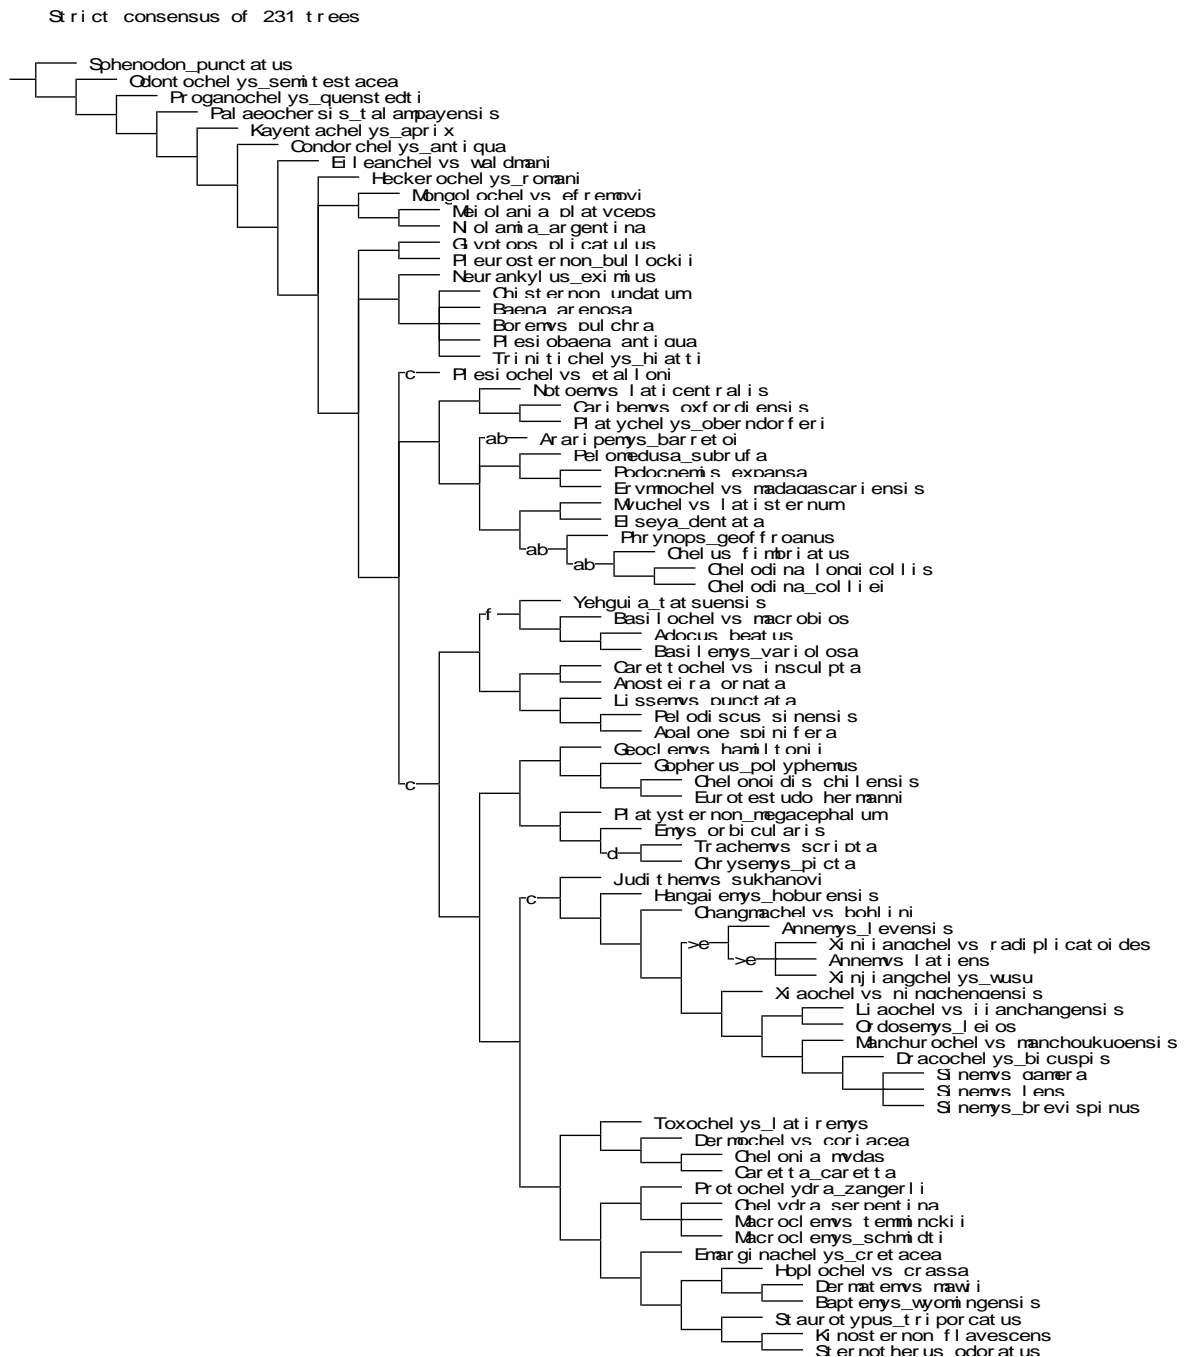

Fig. S4.



Constraining *J. sukhanovi* to the stem of Durocryptodira is resulting in nine extra steps (863 steps). *Changmachelys bohlini*, *Kirgizemys hoburensis*, Xinjiangchelyidae, and Sinemydidae are placed in the crown (to the stem of Durocryptodira) under this topological constraint Fig. S5). Synapomorphies of uniting these clades with Durocryptodira include the absence of extragular scales and a ligamentous plastron-carapace contract in some of the trees.

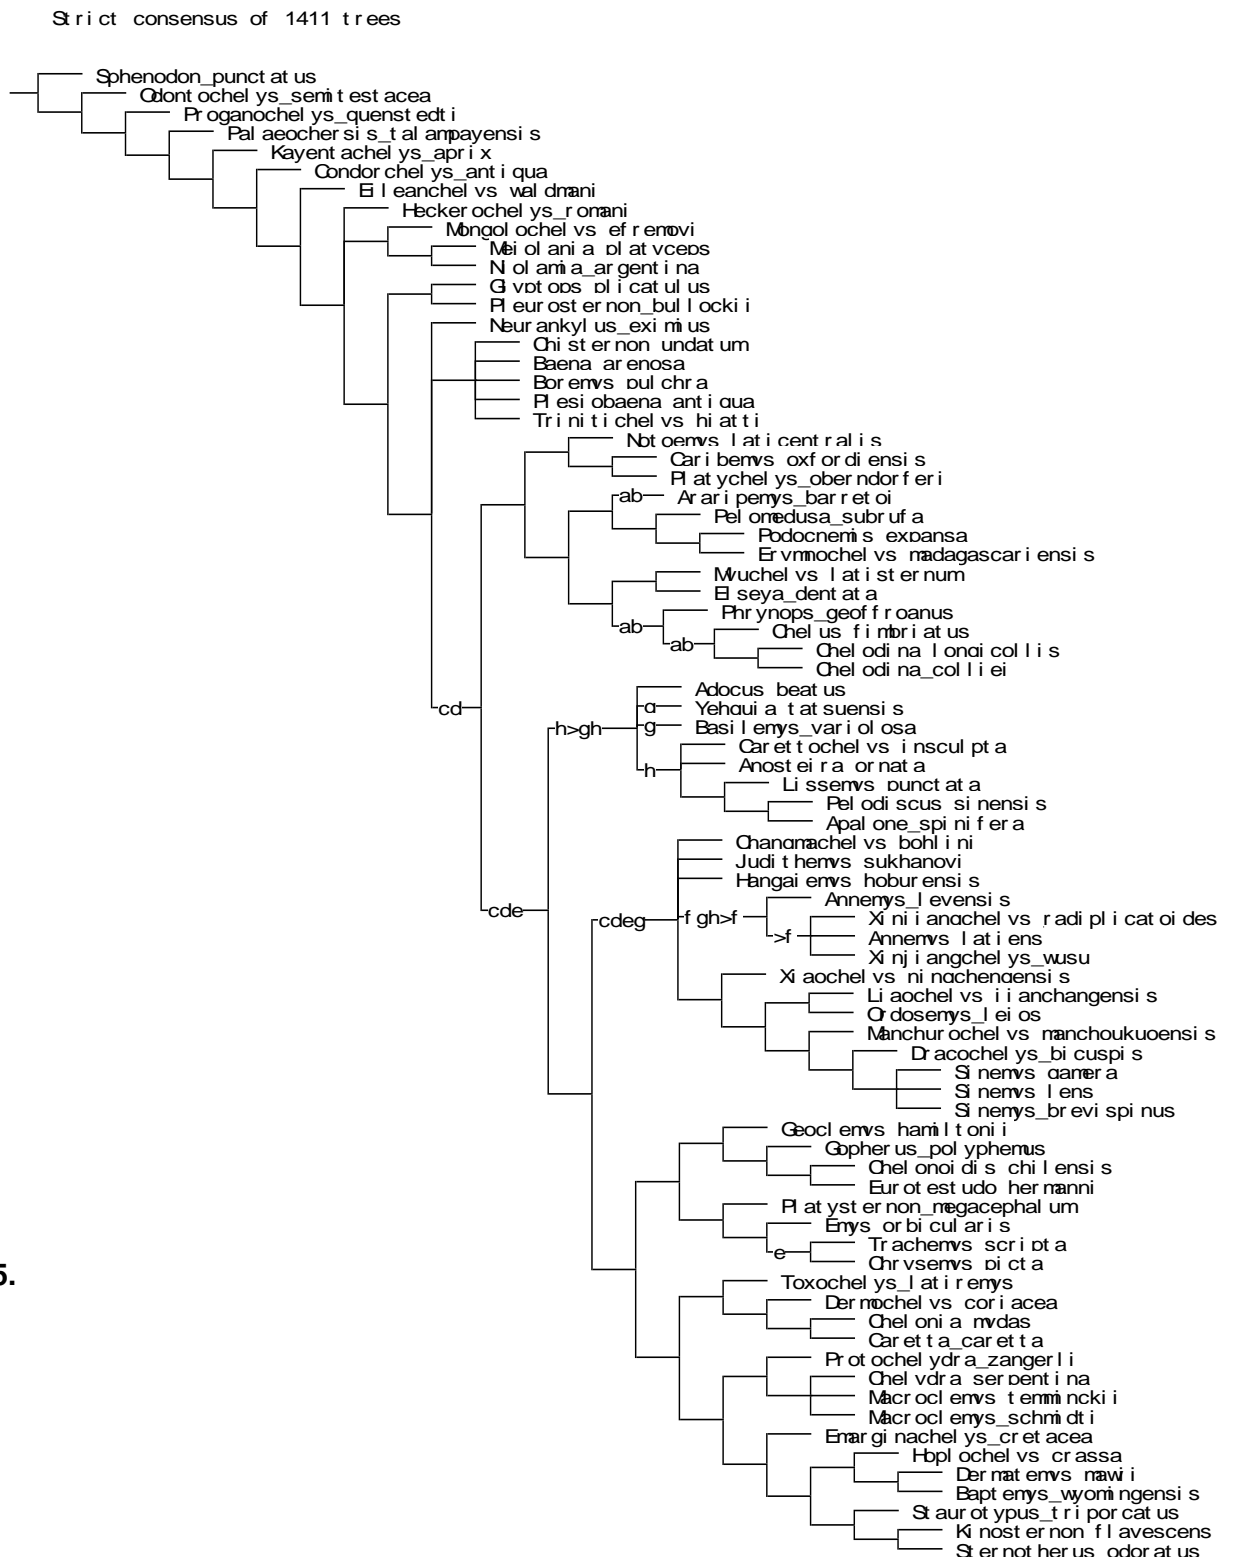

Fig. S5.

Results are similar when *J. sukhanovi* are constrained to the stem of Testudinoidea (10 extra steps, no synapomorphies; Trionychia (7 extra steps, 3 synapomorphies: presence of peripheral gutter, junction of palatal and cerebral artery not enclosed but carotid canal ventrally from the posterior end of the skull, midline sinous plastral sulcus present), and Chelydridae (6 extra steps, 1 synapomorphy: tail as long as carapace).

## Supplementary Materials

**Anatomical comparisons** were made based on direct observation (MR, CFZ) of all relevant Cretaceous basal eucryptodire taxa. *Dracochelys bicuspis* Gaffney and Ye, 1992 (IVPP V4075 holotype); *Kirgizemys* (= *Hangaiemys*) *hoburensis* (Sukhanov and Narmandakh, 1974) (PIN 3334-4, PIN 3334-1, PIN 3334-5, PIN 3334-16, PIN 3334-34, PIN 3334-35, PIN 3334-36, PIN 3334-37); *Judithemys sukhanovi* Parham and Hutchison, 2003 (TMP 87.2.1 holotype and material listed in Parham and Hutchison, 2003); *Liaochelys jianchangensis* Zhou, 2010a (PMOL-AR00140 holotype, PMOL-AR00160); *Manchurochelys manchoukuoensis* Endo and Shikama, 1942 (PMOL-AR00008); *Ordosemys leios* Brinkman and Peng, 1993b (IVPP V9534-1 holotype, and material listed in Brinkman and Peng 1993b); *Ordosemys liaoxiensis* Ji, 1995 (IVPP V11554; Tong et al. 2004); *Sinemys gamera* Brinkman and Peng, 1993a (IVPP V9532-1 holotype, IVPP V9532-11 and material listed in Brinkman and Peng 1993a); *Sinemys brevispinus* Tong and Brinkman, 2013 (IVPP V9538-1 holotype); *Sinemys lens* Wiman, 1930 (IVPP V8755, IVPP V9533-1), *Macrobaena mongolica* Tatarinov, 1959 (PIN 533-4, holotype).

## Institutional abbreviations

IVPP, Institute of Vertebrate Paleontology and Paleoanthropology, Beijing, China; PIN, Paleontological Institute, Russian Academy of Sciences, Moscow, Russia; PMOL, Paleontological Museum of Liaoning, Shenyang Normal University, Shenyang, China; TMP, Royal Tyrrell Museum of Palaeontology, Drumheller, Canada.

## Supplementary Data

### Changes to the matrix of Zhou et al. (2014)

245 morphological characters and 87 taxa

See Supplementary File 1 for synapomorphies.

**Nasal B:** *Sinemys gamera*: 1→?

**Pterygoid B:** *Judithemys sukhanovi*: 2→1

#### Carotid circulation

Our scoring strategy for capturing the systematic variation of the characters pertaining to the carotid circulation is slightly different from that proposed by Sterli et al. (2013). In the new concept, we acknowledge the fact that many stem-cryprodires where the palatal and cerebral branches of the carotid artery are not enclosed in bone still have their carotid extending in the pterygoid from the posterior edge of the skull as in all crown-cryptodires (Rabi et al., 2013). This is fundamentally different from the morphology seen in Pan-Pleurodira where the split is covered in bone but the carotid artery is not floored from the back of the skull. Under the concept of Sterli et al. (2013), pan-pleurodires share the enclosure of the branches into bone with crown-cryptodires but that the morphologies associated with these structures are not comparable is not acknowledged. We therefore choose to give each possible conditions pertaining to the split of the cerebral and palatal branches a separate state and combine Canalis caroticum D and E into the following new character:

**Carotid canal split:** (0) not enclosed in bone; (1) not enclosed but carotid canal is covered ventrally from the posterior end of the skull; (2) enclosed but carotid canal is not covered

ventrally from posterior edge of skull; (3) enclosed and carotid canal covered ventrally from posterior edge of skull.

**Canalis Caroticum D** and **E** are omitted.

**Canalis caroticum F:** This character used to have three states (Sterli et al., 2013): (0) Arteria palatina enters the skull through the interpterygoid vacuity or intrapterygoid slit; (1) enters the skull through the foramen caroticum laterale between basisphenoid and pterygoid; (2) all path inside the skull. This character is reformulated to capture those taxa with an interpterygoid vacuity or slit and combines all more derived morphologies into a single state:

**New definition:** (0) Arteria palatina enters the skull through the interpterygoid vacuity or intrapterygoid slit; (1) through foramen posterius canalis carotici palatinum or split of branches enclosed in skull.

**Carapace D:** *Adocus beatus*: 0→1

**Carapace E:** *Adocus beatus*: - →2

**Nuchal B:** A chelydrid state is introduced (peripheral 3 contacts cositform process).

*Emarginachelys cretacea*, *Chelydra serpentina* and *Macroclommys temminckii* are scored for this state. The character is now ordered.

**Plastron A:** This character is omitted because in some taxa, e.g. xinjiangchelyids and plesiochelyids a ligamentous carapace-plastron contact may look like a sutural contact in well-ossified shells (i.e. older or larger individuals) and hence difficult to score objectively for many fossil taxa known from articulated shells only. Since a revision of this matrix and a

redefinition of characters is in preparation by Rabi, Sterli and Joyce we here simply omit  
Plastron A.

**Plastron B:** *Plesiochelys etalloni*: 0→0&1 (variable based on Anquetin et al., 2014)

**Plastral scutes B:** *Plesiochelys etalloni*: 0→0&1 (variable or transitional morphology based  
on Anquetin et al., 2014)

**Anal A:** *Plesiochelys etalloni*: 0→0&1 (variable based on Anquetin et al., 2014)

**Cervical vertebra B:** *Xinjiangchelys junggarensis*: 0→1 (a ventral keel is well developed on  
cervical 8 based on a personal observation of IVPP V9537-1)

**Cervical vertebra C:** *Sinemys lens* 0→?; *Xinjiangchelys junggarensis* 0→1; *Changmachelys  
bohlini* ?→1

**Cervical articulation A:** *Xinjiangchelys junggarensis* 0→1 (based on cervical 8);  
*Xinjiangchelys wusu* 0→?; *Basilochelys macrobios* 0→?

**Cervical articulation H:** *Xinjiangchelys junggarensis* - →1

**Cervical articulation L:** *Xinjiangchelys junggarensis* - →0

**Cervical vertebra I:** State (1) is modified to: neural arch on 8th cervical modified with the  
postzygapophyses articular surface greatly expanded and/or pointing posteroventrally. The  
scoring has been modified for the following taxa: *Mesodermochelys undulatus* 0→1;  
*Dermochelys coriacea* 0→1; *Toxochelys latiremys*: ?→1; *Xinjiangchelys junggarensis*: 0→1;  
*Judithemys sukhanovi*: 0&1→1; *Dracochelys bicuspis*: 0→1; *Ordosemys leios*: 0→1;  
*Plesiobaena antiqua*: ?→0

**Caudal C:** *Mongolemys elegans*: ?→1 (based on Cadena et al., 2013)

**Caudal D:** *Mongolemys elegans*: ?→1 (based on Cadena et al., 2013)

**Posterior plastral fontanella:** *Meiolania platyceps*: 0→1; *Chelydra serpentina*: 0→1;

*Macrolemmys temminckii*: 0→1; *Mongolochelys efremovi*: 0→1

**Costal rib distal end:** State (1) is modified to: costo-peripheral fontanelles absent, distal end of posterior dorsal ribs visible *or distal end of posterior costals narrow in dorsal view and surrounded by the peripheral*. As probably an ontogenetic variation, in some sinemydids, e.g. *Xiaochelys ningchengensis*, the distal end of the posterior ribs may not be visible due greater ossification but the corresponding costals are still narrow and the peripherals develop an unusual, proximally extending metaplastic sheet of bone to receive the costals. *Ordosemys leios*, however, exhibits none of these morphologies yet still recovered as a sinemydid.

**Pterygoid I:** Changed from non-applicable to 0 in all pan-pleurodires where this part of the skull is preserved.

**Maxilla D:** *Mongolemys elegans* 2→0 (there is only a labial ridge present).

**Hyoplastron B:** *Emarginachelys cretacea* ?→1; *Basilemys variolosa* ?→0

## **New osteological characters**

**Tail length:** (0) tail as long as carapace; (1) tail clearly shorter than carapace.

**Cruciform plastron:** (0) absent; (1) present (e.g. *Chelydra serpentina*, *Kirgizemys hoburensis*, *Sternotherus odoratus*, *Chelonia mydas*, *Araripemys barretoï*).

**Articulation of posterior cervical centra:** (0) circular or subcircular in outline; (1) greatly flattened in outline (in coronal plane view).

**Nuchal emargination** (modified from Gaffney et al., 2006): (0) absent or indistinct; (1) present, excludes peripheral 1; (2) deep and involves peripheral 1 (*ordered*).

**Nuchal posterior edge:** (0) less than three times longer than lateral edge; (1) more than three times longer than lateral edge of nuchal.

**Pterygoid extension** (Gaffney and Meylan, 1988): (0) pterygoid not extending to posterior end of skull and covering prootic; (1) pterygoid extending to posterior end of skull and covering prootic.

Comment: This character was partly included in Canalis Caroticum E which we have omitted (see explanation above).

**Carotid canal entry:** (0) foramen posterius canalais carotici interni is not at back of skull; (1) fpcci located at back of skull in pterygoid.

Comment: This character is added to capture the morphology where the carotid enters at the back of the skull in the pterygoid. This character is not correlated with the character "Pterygoid extension" because paracryptodires have a posteriorly extending pterygoid but they lack a true fpcci. It is furthermore not correlated with the character "Carotid canal split".

## **List of characters omitted from the analysis**

### **Pterygoid L**



Comment: This character was introduced by Sterli and de la Fuente (2011) but we can not objectively reproduce their scorings and we therefore rather choose to omit it given the ongoing revision of previous global turtle matrices by Rabi, Joyce and Sterli.

#### **Canalis caroticum D,**

#### **Canalis caroticum E**

#### **Canalis caroticum G**

Comment: These characters are now redundant with the new or redefined characters introduced above.

#### **Carapacial sutures**

Comment: This character was introduced by Zhou et al. (2014) and the derived state was thought to be unique to certain sinemydids. However, our revision of other taxa revealed that it is apparently more widespread than previously recognized and therefore we see little utility in keeping it.

### **List of taxa included in the analysis**

*Sphenodon punctatus*

*Odontochelys semitestacea*

*Proganochelys quenstedti*

*Palaeochersis talampayensis*

*Condorchelys antiqua*

*Kayentachelys aprix*

*Heckerochelys romani*

*Eileanchelys waldmani*

*Mongolochelys efremovi*

*Meiolania platyceps*

*Niolamia argentina*

*Glyptops plicatulus*

*Pleurosternon bullocki*  
*Notoemys laticentralis*  
*Platychely oberndorferi*  
*Caribemys oxfordensis*  
*Prochelidella cerrobarcinae*  
*Elysea dentata*  
*Myuchelys latisternum*  
*Chelodina colliei*  
*Chelodina longicollis*  
*Yaminuchelys maior*  
*Phrynops geoffroanus*  
*Chelus fimbriatus*  
*Araripemys barretoii*  
*Erymnochelys madagascariensis*  
*Pelomedusa subrufa*  
*Podocnemis expansa*  
*Neurankylus eximius*  
*Trinitichelys hiatti*  
*Chisternon undatum*  
*Plesiobaeana antiqua*  
*Baena arenosa*  
*Boremys pulchra*  
*Plesiochelys etalloni*  
*Solnhofia parsonsi*  
*Siamochelys peninsularis*  
*Annemys levensis*  
*Xinjiangchelys junggarensis*  
*Annemys latiensi*  
*Xinjiangchelys radipectoides*  
*Xinjiangchelys wusu*  
*Xiaochelys ningchengensis*  
*Liaochelys jianchangensis*  
*Ordosemys leios*  
*Manchurochelys manchoukuoensis*  
*Dracochelys bicuspis*  
*Sinemys gamera*  
*Sinemys lens*  
*Sinemys brevispinus*  
*Changmachelys bohlini*  
*Kirgizemys hoburensis*  
*Judithemys sukhanovi*  
*Basilochelys macrobios*

*Yehguia tatsuensis*  
*Adocus beatus*  
*Basilemys variolosa*  
*Carettochelys insculpta*  
*Anosteira ornata*  
*Lissemys punctata*  
*Pelodiscus sinensis*  
*Apalaone spinifera*  
*Echmatemys wyomingensis*  
*Geoclemys hamiltonii*  
*Gopherus polyphemus*  
*Chelonidis chilensis*  
*Eurotestudo hermanni*  
*Platysternon megacephalum*  
*Emys orbicularis*  
*Mongolemys elegans*  
*Trachemys scripta*  
*Chrysemys picta*  
*Toxochelys latiremys*  
*Dermochelys coriacea*  
*Chelonia mydas*  
*Caretta caretta*  
*Protochelydra zangerli*  
*Chelydra serpentina*  
*Macrochelymys temminckii*  
*Macrochelymys schmidti*  
*Emarginachelys cretacea*  
*Hoplochelys crassa*  
*Dermatemys mawii*  
*Baptemys wyomingensis*  
*Staurotypus triporcatus*  
*Kinosternon flavescens*  
*Sternotherus odoratus*

### **List of taxa omitted from the analysis**

*Simosaurus gaillardoti*  
*Owenetta kitchingorum*  
*Anthodon serrarius*  
*Proterochersis robusta*  
*Australochelys africanus*

*Indochelys spatulata*  
*Ninjemys oweni*  
*Warkalania carinaminor*  
*Chubutemys copelloi*  
*Kallokibotion bajazidi*  
*Peligrochelys walshae*  
*Patagoniaemys gasparinae*  
*Otwayemys cunicularis*  
*Dorsetochelys delairi*  
*Dinochelys whitei*  
*Portlandemys macdowellii*  
*Thalassemys moseri*  
*Santanachelys gaffneyi*  
*Mesodermochelys undulatus*  
*Chelonoidis gringorum*  
*Stylemys nebraskensis*  
*Xenochelys formosa*  
*Plastomenus aff. thomassii*  
*Shachemys laosiana*  
*Chengyuchelys baenoides* (IVPP V6507)  
*Ordosemys* skull (IVPP V12092)

**Fig. S1. Molecular scaffold used for parsimony analysis based on the phylogeny of**

**Crawford et al. (2015).**

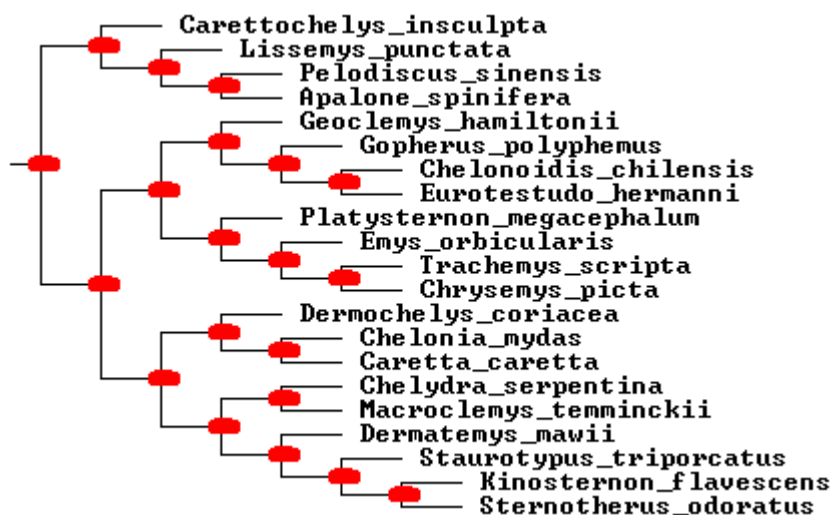

## List of taxa treated as floaters in the constrained analysis

*Plesiochelys etalloni*  
*Solnhofia parsonsi*  
*Siamochelys peninsularis*  
*Annemys levensis*  
*Xinjiangchelys junggarensis*  
*Annemys latiens*  
*Xinjiangchelys radiplicatoides*  
*Xinjiangchelys wusu*  
*Xiaochelys ningchengensis*  
*Liaochelys jianchangensis*  
*Ordosemys leios*  
*Manchurochelys manchoukuoensis*  
*Dracochelys bicuspis*  
*Sinemys gamera*  
*Sinemys lens*  
*Sinemys brevispinus*  
*Changmachelys bohlini*  
*Kirgizemys hoburensis*  
*Basilochelys macrobios*  
*Yehguia tatsuensis*  
*Adocus beatus*  
*Basilemys variolosa*  
*Echmatemys wyomingensis*  
*Anosteira ornata*  
*Mongolemys elegans*  
*Toxochelys latiremys*  
*Protochelydra zangerli*  
*Macrolemys schmidti*  
*Emarginachelys cretacea*  
*Hoplochelys crassa*  
*Baptemys wyomingensis*

## Supplementary References

- Anquetin, J., Püntener, C., & Billon-Bruyat, J. P. A taxonomic review of the Late Jurassic eucryptodiran turtles from the Jura Mountains (Switzerland and France). *PeerJ* **2**, e369 (2014).
- Brinkman, D. B. & Peng, J.-H. New material of *Sinemys* (Testudines, Sinemydidae) from the Early Cretaceous of China. *Canadian Journal of Earth Sciences*. **30**, 2139-2152 (1993a).
- Brinkman, D. B. & Peng, J.-H. *Ordosemys leios*, n. gen., n. sp., a new turtle from the Early Cretaceous of the Ordos Basin, Inner Mongolia. *Canadian Journal of Earth Sciences*. **30**, 2128-2138 (1993b).
- Cadena, E. A., Ksepka, D. T., & Norell, M. A. New material of *Mongolemys elegans* Khosatzky and Mlynarski, 1971 (Testudines: Lindholmemydidae), from the Late Cretaceous of Mongolia with comments on bone histology and phylogeny. *American Museum Novitates* 3766, 1-28 (2013).
- Crawford, N. G., Parham, J. F., Sellas, A. B., Faircloth, B. C., Glenn, T. C., Papenfuss, T. J., & Simison, W. B. A phylogenomic analysis of turtles. *Molecular phylogenetics and evolution* **83**, 250-257 (2015).
- Endo, R. & Shikama, R. Mesozoic reptilian fauna in the Jehol Mountainland, Manchoukuo. *Buletin of the Central National Museum of Manchoukuo* **3**, 1-20 (1942).
- Gaffney, E. S., & Meylan, P. A. A phylogeny of turtles. *In: The Phylogeny and Classification of the Tetrapods, Volume 1: Amphibians, Reptiles, Birds* (M. J. Benton, Ed) pp. 157-219, Systematics Association Special Volume No. 35A, Clarendon Press, Oxford (1988).

Gaffney, E. S. & Ye, X.-K. *Dracochelys*, a new cryptodiran turtle from the Early Cretaceous of China. *American Museum Novitates* **3048**, 1-13 (1992).

Gaffney, E. S., Tong, H., & Meylan, P. A. Evolution of the side-necked turtles: the families Bothremydidae, Euraxemydidae, and Araripemydidae. *Bulletin of the American Museum of Natural History*, 1-698 (2006).

Ji, S.-A. Reptiles. *In: Fauna and Stratigraphy of Jurassic-Cretaceous in Beijing and the Adjacent Areas* (Ren D, Lu L-W, Guo Z-G, Ji S-A, Eds) pp. 140-146, Seismic Press, Beijing (1995).

Parham, J. F. & Hutchison, J. H. A new eucryptodiran turtle from the Late Cretaceous of North America (Dinosaur Provincial Park, Alberta, Canada). *Journal of Vertebrate Paleontology* **23**, 783-798 (2003).

Pritchard, P. C. H. *Encyclopedia of turtles*. T.F.H. Publications, Hong Kong (1979).

Rabi, M., Zhou, C. F., Wings, O., Ge, S., & Joyce, W. G. A new xinjiangchelyid turtle from the Middle Jurassic of Xinjiang, China and the evolution of the basipterygoid process in Mesozoic turtles. *BMC evolutionary Biology*, **13**(1), 203 (2013).

Sterli, J., & De La Fuente, M. S. A new turtle from the La Colonia Formation (Campanian–Maastrichtian), Patagonia, Argentina, with remarks on the evolution of the vertebral column in turtles. *Palaeontology*, **54**(1), 63-78.(2011).

Sterli, J., Pol, D., & Laurin, M. Incorporating phylogenetic uncertainty on phylogeny-based palaeontological dating and the timing of turtle diversification. *Cladistics* **29**, 233-246 (2013).

Sukhanov, V. B. & Narmandakh, P. [A new Early Cretaceous turtle from the continental deposits of the Northern Gobi (in Russian)] *Mesozoic and Cenozoic Faunas and Biostratigraphy of Mongolia. Transactions of the. Joint Soviet Mongolian Paleontological Expedition* **1**, 192-220 (1974).

Tatarinov, L. P. A new turtle of the family Baenidae from the Lower Eocene of Mongolia. *Paleontologicheskii Zhurnal* **1**, 100-113 (1959). [in Russian]

Tong, H. & Brinkman, D. A new species of *Sinemys* (Testudines: Cryptodira: Sinemydidae) from the Early Cretaceous of Inner Mongolia, China. *Palaeobio. Palaeoenv.* **93**, 355-366 (2013).

Tong, H., Ji, S.-A. & Ji, Q. *Ordosemys* (Testudines: Cryptodira) from the Yixian Formation of Liaoning Province, northeastern China: new specimens and systematic revision. *Am. Mus. Novit.* **3438**, 1-20 (2004).

Wiman, C. Fossile Schildkroten aus China. *Palaeontologia Sinica, Series C*, **6**, 5-53 (1930).

Zhou, C.-F. A new eucryptodiran turtle from the Early Cretaceous Jiufotang Formation of western Liaoning, China. *Zootaxa* **2676**, 45-56 (2010a).

Zhou, C.-F., Rabi, M., & Joyce, W. G. A new specimen of *Manchurochelys manchoukuoensis* from the Early Cretaceous Jehol Biota of Chifeng, Inner Mongolia, China and the phylogeny of Cretaceous basal eucryptodiran turtles. *BMC Evolutionary Biology* **14**, 77 (2014).



# Synapomorphy Tree

Synapomorphies common to 1469 trees

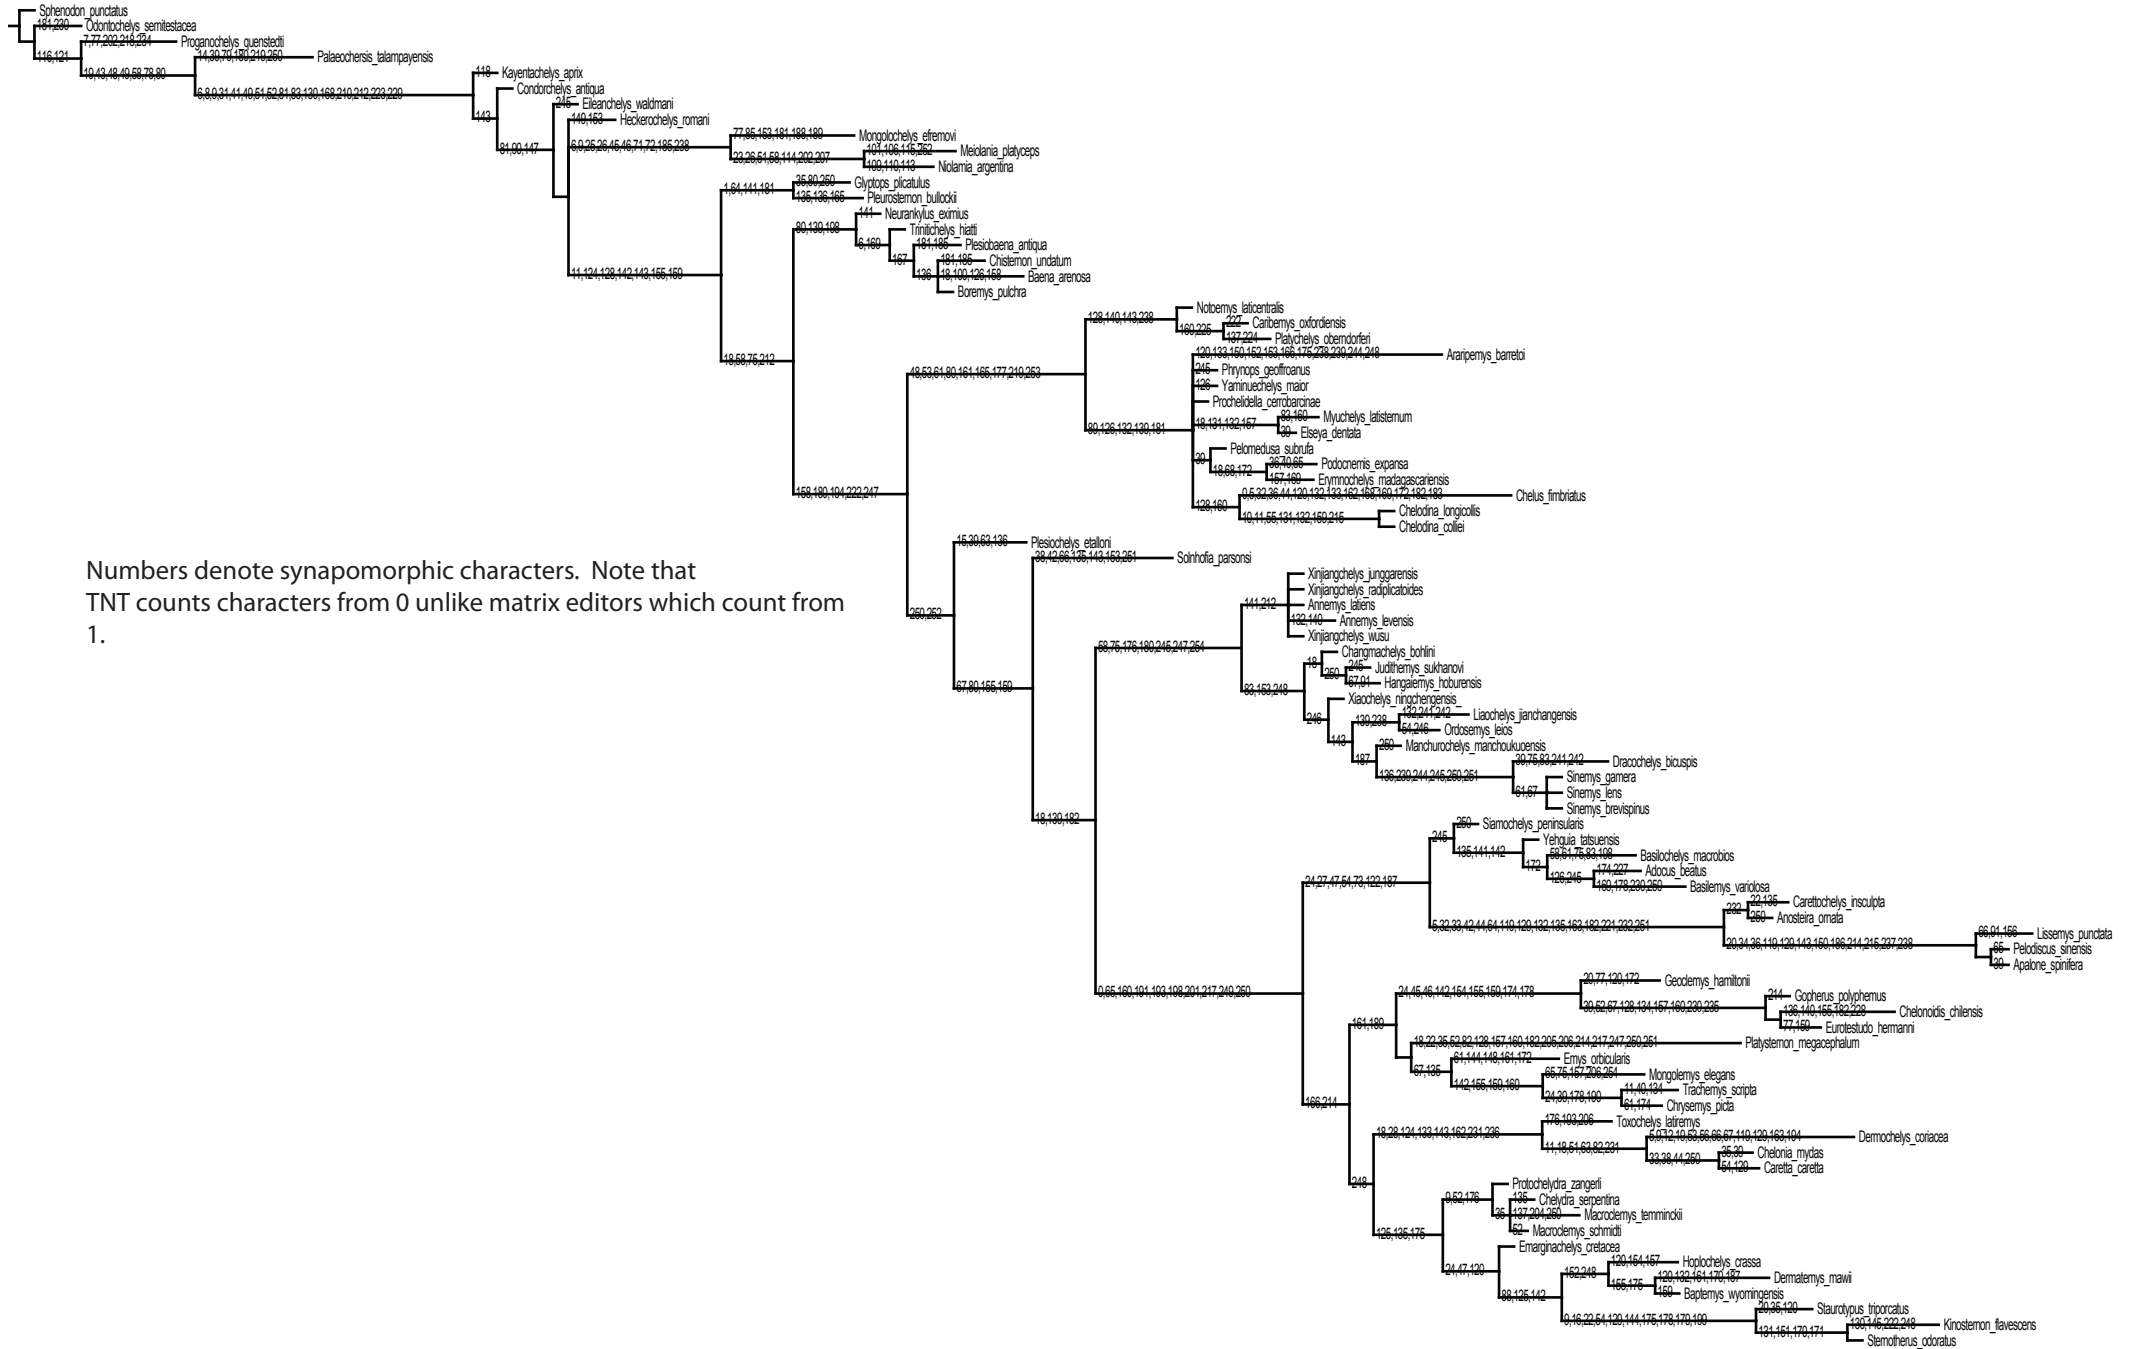

Supplement: srep16299-s1.pdf [file srep16299-s1.pdf]
